# Supplementary material
Source: MDPI journal article supplement (https://www.mdpi.com/1424-2818/13/4/169)
Supplement: s1 [file s1]

**Table S1.** The predictors considered for the species distribution modeling. The predictors used after accounting for multicollinearity are in bold.

| Category              | Predictor                   | Description                                                | Units    | Original Resolution | Source                           | Reference |
|-----------------------|-----------------------------|------------------------------------------------------------|----------|---------------------|----------------------------------|-----------|
| Climate               | <b>mean_ann_temp</b>        | Annual Mean Temperature                                    | °C       | 2.5min              | WORLDCLIM version 2.1            | [1]       |
|                       | <b>mean_diurnal_range</b>   | Mean Diurnal Range (Mean of monthly (max temp - min temp)) | °C       |                     |                                  |           |
|                       | <b>isothermality</b>        | Isothermality                                              | %        |                     |                                  |           |
|                       | temp_seas                   | Temperature Seasonality (standard deviation *100)          | %        |                     |                                  |           |
|                       | max_temp_warm_mo            | Maximum Temperature of Warmest Month                       | °C       |                     |                                  |           |
|                       | min_temp_cold_mo            | Minimum Temperature of Coldest Month                       | °C       |                     |                                  |           |
|                       | temp_ann_range              | Temperature Annual Range                                   | °C       |                     |                                  |           |
|                       | <b>mean_temp_wett_quart</b> | Mean Temperature of Wettest Quarter                        | °C       |                     |                                  |           |
|                       | mean_temp_driest_quart      | Mean Temperature of Driest Quarter                         | °C       |                     |                                  |           |
|                       | mean_temp_warm_quart        | Mean Temperature of Warmest Quarter                        | °C       |                     |                                  |           |
|                       | mean_temp_cold_quart        | Mean Temperature of Coldest Quarter                        | °C       |                     |                                  |           |
|                       | ann_prec                    | Annual Precipitation                                       | mm       |                     |                                  |           |
|                       | prec_wett_mo                | Precipitation of Wettest Month                             | mm       |                     |                                  |           |
|                       | prec_driest_mo              | Precipitation of Driest Month                              | mm       |                     |                                  |           |
| Elevation             | <b>prec_seas</b>            | Precipitation Seasonality (Coefficient of Variation)       | %        | 25m                 | EU-DEM version 1.1               | [2]       |
|                       | prec_wett_quart             | Precipitation of Wettest Quarter                           | mm       |                     |                                  |           |
|                       | prec_driest_quart           | Precipitation of Driest Quarter                            | mm       |                     |                                  |           |
|                       | <b>prec_warm_quart</b>      | Precipitation of Warmest Quarter                           | mm       |                     |                                  |           |
|                       | <b>prec_cold_quart</b>      | Precipitation of Coldest Quarter                           | mm       |                     |                                  |           |
|                       | <b>dem</b>                  |                                                            | m        |                     |                                  |           |
|                       | <b>lakes</b>                | Pixel coverage                                             | %        |                     |                                  |           |
|                       | <b>rivers</b>               | Length per pixel                                           | km/pixel |                     |                                  |           |
| Water availability    |                             |                                                            |          |                     | CCM River and Catchment Database | [4]       |
| Prey species richness | <b>prey_sp_richness</b>     | Number of prey species per pixel                           |          |                     |                                  |           |

**Table 2.** Spearman's rho correlation coefficients between bioclimatic variables. All correlations had significance levels  $p < 0.05$ .

[illegible]

**Table S2.** (Continued).

[illegible]

**Table S3.** The models used for the ensemble modeling and the associated parameter settings.

| Model | Parameter settings                                                                                                                                                                                                                                                                                                                                                                                                                                                                                                                                                                                                                                                                                                                                                                                       |
|-------|----------------------------------------------------------------------------------------------------------------------------------------------------------------------------------------------------------------------------------------------------------------------------------------------------------------------------------------------------------------------------------------------------------------------------------------------------------------------------------------------------------------------------------------------------------------------------------------------------------------------------------------------------------------------------------------------------------------------------------------------------------------------------------------------------------|
| GLM   | type = 'quadratic', interaction.level = 0, myFormula = NULL, test = 'AIC', mustart = 0.5, control = glm.control(epsilon = 1e-08, maxit = 50, trace = FALSE)                                                                                                                                                                                                                                                                                                                                                                                                                                                                                                                                                                                                                                              |
| GAM   | algo = 'GAM_mgcv', type = 's_smoother', k = 3, interaction.level = 0, myFormula = NULL, family = binomial(link = 'logit'),<br>method = 'GCV.Cp', optimizer = c('outer', 'newton'), select = FALSE, knots = NULL, paraPen = NULL,<br>control = list(nthreads = 1, irls.reg = 0, epsilon = 1e-07, maxit = 200, trace = FALSE, mgcv.tol = 1e-07,<br>mgcv.half = 15, rank.tol = 1.49011611938477e - 08,<br>nlm = list(ndigit = 7, gradtol = 1e-06, stepmax = 2, steptol = 1e-04, iterlim = 200, check.analyticals = 0), optim = list(factr=1e + 07),<br>newton = list(conv.tol = 1e-06, maxNstep = 5, maxSstep = 2, maxHalf = 30, use.svd = 0), outerPIsteps = 0, idLinksBases = TRUE,<br>scalePenalty = TRUE, efs.lspmax = 15, efs.tol = 0.1, keepData = FALSE, scale.est = fletcher, edge.correct = FALSE) |
| FDA   | method = 'mars', add_args = NULL                                                                                                                                                                                                                                                                                                                                                                                                                                                                                                                                                                                                                                                                                                                                                                         |
| GBM   | distribution = 'bernoulli', n.trees = 1000, interaction.depth = 7, n.minobsinnode = 5, shrinkage = 0.001, bag.fraction = 0.5,<br>train.fraction = 1, cv.folds = 3, keep.data = FALSE, verbose = FALSE, perf.method = 'cv', n.cores = NULL                                                                                                                                                                                                                                                                                                                                                                                                                                                                                                                                                                |

**Table S4.** The total number of occurrences and separately for GBIF and European atlases (Sillero, *et al.* [5] atlas for reptiles and amphibians and Mitchell-Jones, *et al.* [6] for mammals) originally in the datasets, the number of presences kept in the modeling procedure, True Skill Statistic (TSS), Area Under the Curve (AUC), sensitivity and specificity scores for the presented cut-off value used to transform continuous probability of presence (range 0–1) to binary for each prey species and the coefficient of variation of the ensemble model prediction for each species averaged over the area of prediction.

|                              | TSS AUC |      | Cut-off | Sensitivity | Specificity | Mean coefficient of variation | Presences | Total occurrences | GBIF occurrences | European atlas occurrences |
|------------------------------|---------|------|---------|-------------|-------------|-------------------------------|-----------|-------------------|------------------|----------------------------|
| Mammals                      |         |      |         |             |             |                               |           |                   |                  |                            |
| <i>Apodemus sylvaticus</i>   | 0.73    | 0.94 | 0.46    | 93.28       | 79.58       | 50.68 ± 45.55                 | 1698.00   | 37314.00          | 37314.00         | 1780.00                    |
| <i>Mus musculus</i>          | 0.69    | 0.92 | 0.42    | 86.88       | 82.39       | 33.29 ± 25.62                 | 1236.00   | 34979.00          | 34979.00         | 965.00                     |
| <i>Rattus rattus</i>         | 0.75    | 0.94 | 0.50    | 93.16       | 81.78       | 46.26 ± 33.41                 | 864.00    | 14787.00          | 14787.00         | 909.00                     |
| Amphibians                   |         |      |         |             |             |                               |           |                   |                  |                            |
| <i>Bufo bufo</i>             | 0.616   | 0.90 | 0.63    | 72.31       | 89.28       | 2.15 ± 2.09                   | 2417.00   | 101013.00         | 98759.00         | 2254.00                    |
| <i>Lissotriton vulgaris</i>  | 0.66    | 0.90 | 0.40    | 86.11       | 79.73       | 43.28 ± 38.04                 | 1750.00   | 56205.00          | 54514.00         | 1691.00                    |
| <i>Pelophylax ridibundus</i> | 0.71    | 0.94 | 0.51    | 88.42       | 82.11       | 40.38 ± 38.43                 | 1409.00   | 19575.00          | 18170.00         | 1405.00                    |
| <i>Pseudepidalea viridis</i> | 0.77    | 0.96 | 0.50    | 90.77       | 86.23       | 47.41 ± 34.40                 | 337.00    | 8266.00           | 7515.00          | 751.00                     |
| <i>Rana temporaria</i>       | 0.63    | 0.91 | 0.55    | 77.27       | 85.38       | 21.03±37.34                   | 2183.00   | 12207.00          | 10228.00         | 1979.00                    |
| Reptiles                     |         |      |         |             |             |                               |           |                   |                  |                            |
| <i>Podarcis muralis</i>      | 0.83    | 0.97 | 0.41    | 96.41       | 86.97       | 76.65 ± 38.96                 | 726.00    | 49042.00          | 48340.00         | 702.00                     |

**Table S5.** Variable importance (%) for the prediction of each prey species probability of presence in the abiotic ensemble species distribution model rescaled to sum up to 100. The three most important variables are highlighted with bold.

|                              | Mean annual temperature | Mean diurnal range | Isothermality | Mean temperature of wettest quarter | Precipitation seasonality | Precipitation of warmest quarter | Precipitation of coldest quarter | Elevation   | Coverage (%) of lakes | Length of rivers |
|------------------------------|-------------------------|--------------------|---------------|-------------------------------------|---------------------------|----------------------------------|----------------------------------|-------------|-----------------------|------------------|
| Mammals                      |                         |                    |               |                                     |                           |                                  |                                  |             |                       |                  |
| <i>Apodemus sylvaticus</i>   | <b>9.58</b>             | <b>3.84</b>        | <b>79.47</b>  | 2.70                                | 2.62                      | 0.08                             | 0.11                             | 0.99        | 0.03                  | 0.57             |
| <i>Mus musculus</i>          | <b>21.82</b>            | 4.64               | <b>59.37</b>  | 1.64                                | 2.08                      | 2.06                             | 1.06                             | <b>6.77</b> | 0.45                  | 0.12             |
| <i>Rattus rattus</i>         | <b>61.14</b>            | 3.10               | <b>14.64</b>  | <b>11.34</b>                        | 2.30                      | 1.10                             | 0.60                             | 2.75        | 0.51                  | 2.52             |
| Amphibians                   |                         |                    |               |                                     |                           |                                  |                                  |             |                       |                  |
| <i>Bufo bufo</i>             | <b>46.27</b>            | 1.37               | <b>6.94</b>   | <b>30.52</b>                        | 1.01                      | 0.86                             | 5.79                             | 1.27        | 0.84                  | 5.12             |
| <i>Lissotriton vulgaris</i>  | <b>55.63</b>            | <b>9.98</b>        | <b>8.99</b>   | 8.16                                | 0.24                      | 3.17                             | 2.04                             | 6.88        | 2.24                  | 2.67             |
| <i>Pelophylax ridibundus</i> | <b>57.45</b>            | <b>11.18</b>       | <b>14.75</b>  | 5.69                                | 1.26                      | 3.01                             | 2.52                             | 0.31        | 1.65                  | 2.17             |
| <i>Pseudepidalea viridis</i> | <b>52.67</b>            | <b>13.44</b>       | <b>22.46</b>  | 2.08                                | 2.21                      | 3.74                             | 2.31                             | 0.63        | 0.31                  | 0.14             |
| <i>Rana temporaria</i>       | 8.91                    | <b>12.27</b>       | 6.42          | <b>14.77</b>                        | 3.43                      | <b>43.44</b>                     | 0.76                             | 1.73        | 2.61                  | 5.66             |
| Reptiles                     |                         |                    |               |                                     |                           |                                  |                                  |             |                       |                  |
| <i>Podarcis muralis</i>      | <b>23.77</b>            | 5.23               | <b>49.85</b>  | 0.65                                | 6.83                      | 2.69                             | 2.95                             | <b>7.60</b> | 0.23                  | 0.21             |

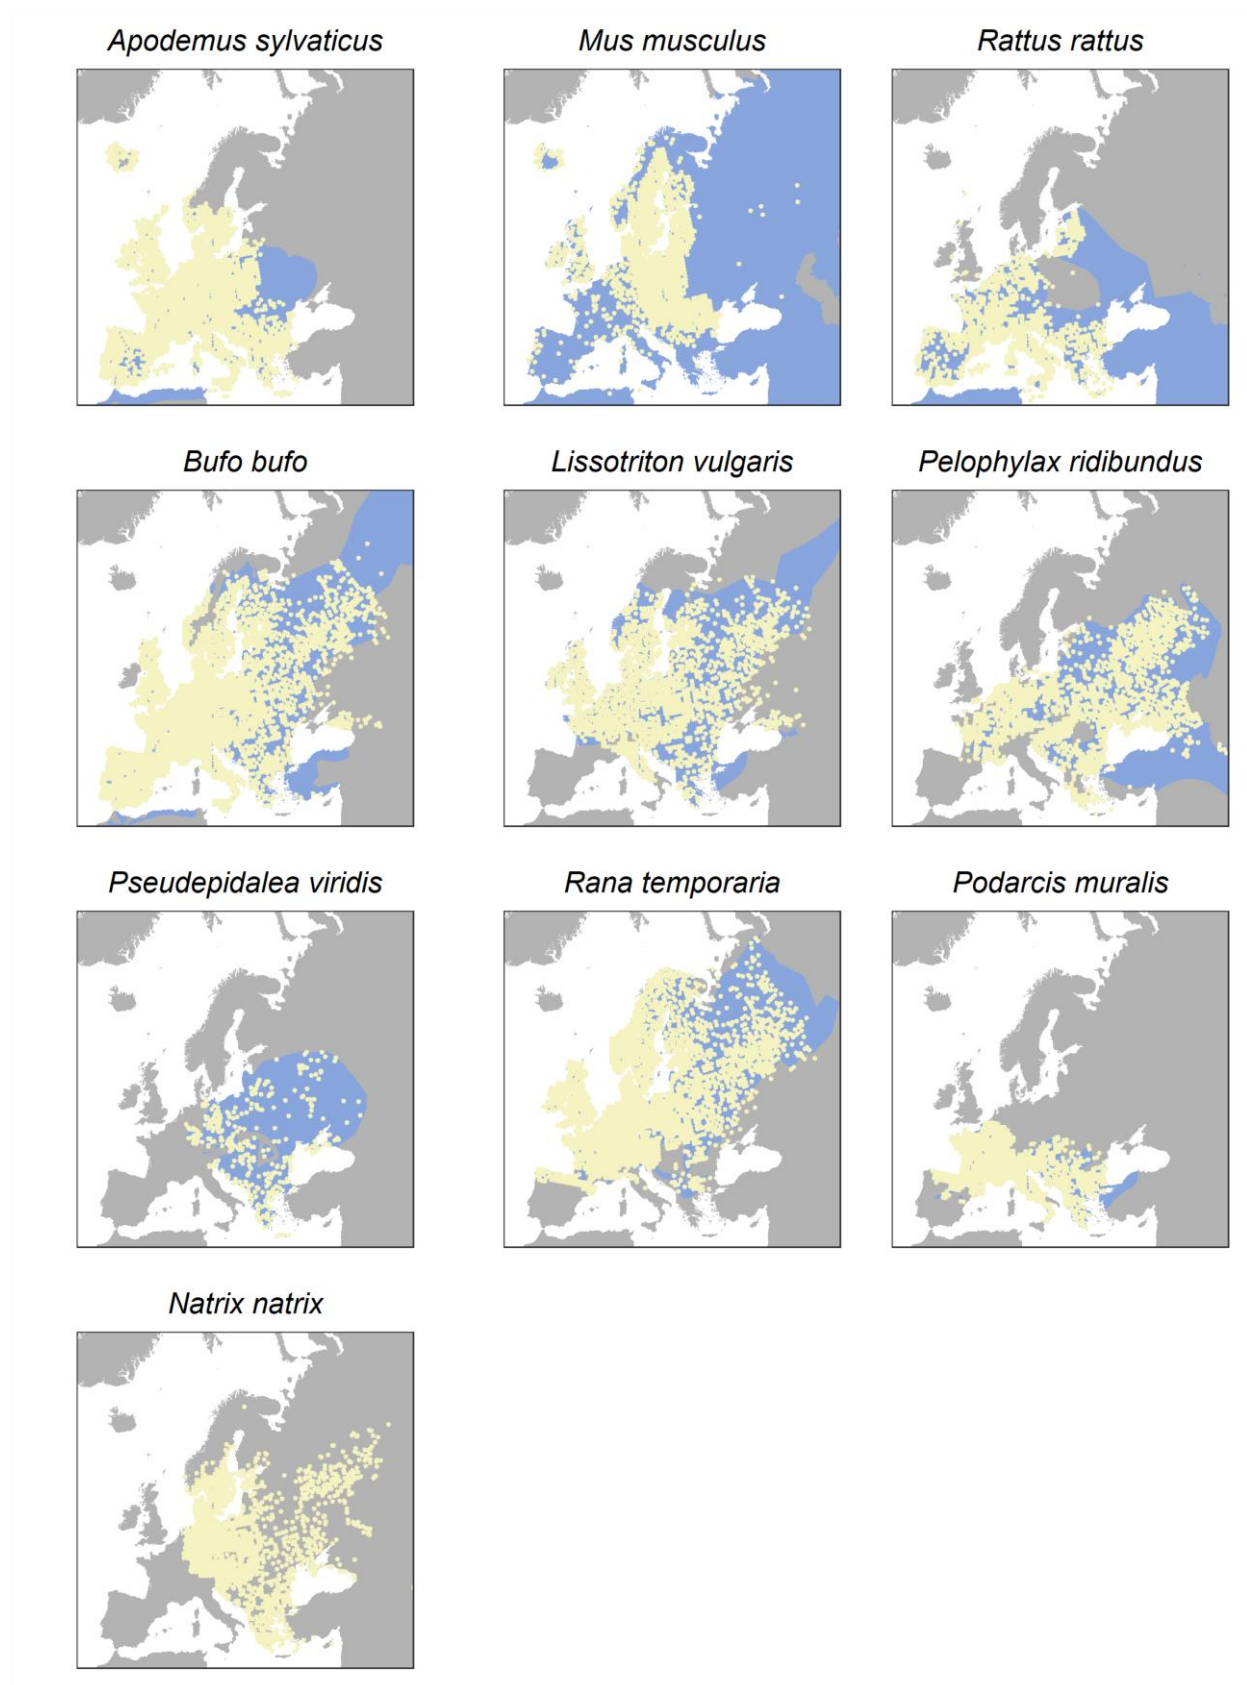

**Figure S1.** Presences used in the modeling process for each species after removal of invalid records and multiple observations per grid cell. The blue polygons depict the range of each species as obtained by IUCN [7], except for *Natrix natrix* for which there are no available distributional data by IUCN [7]. Scale: 1: 110,000,000.

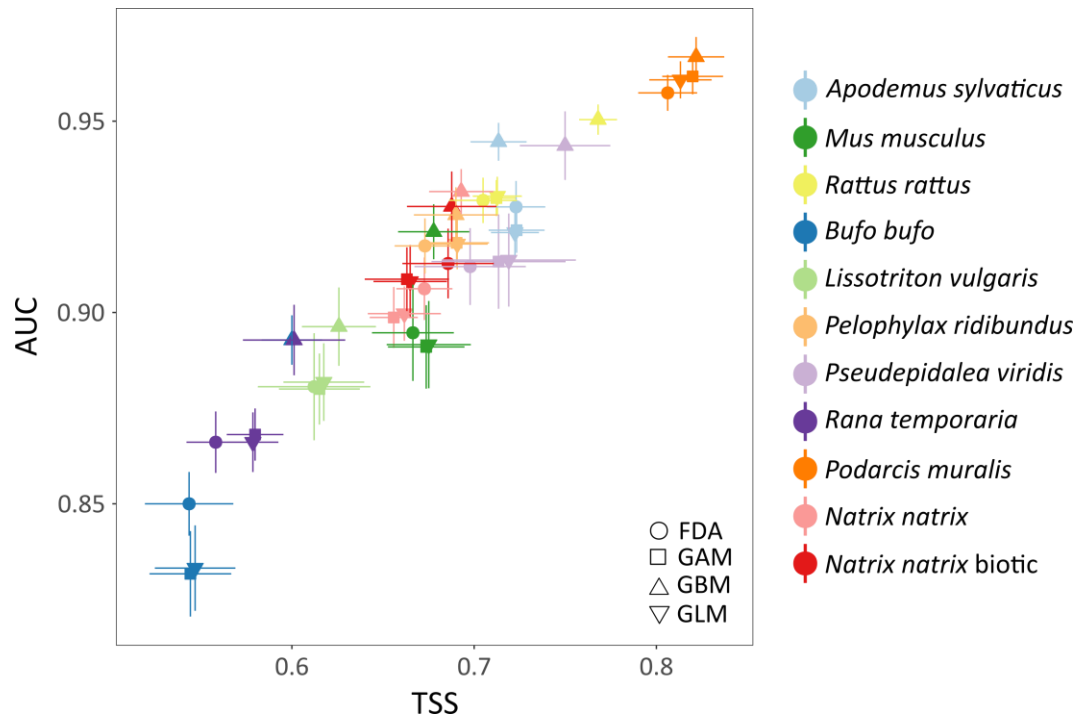

**Figure S2.** Scores of True Skill Statistic (TSS) and Area Under the Curve (AUC) for each individual model, prey species and model type (abiotic and biotic) for *Natrix natrix*. Different shapes represent different modeling methods and different colors correspond to different species. Horizontal and vertical lines indicate standard deviations for TSS and AUC respectively.

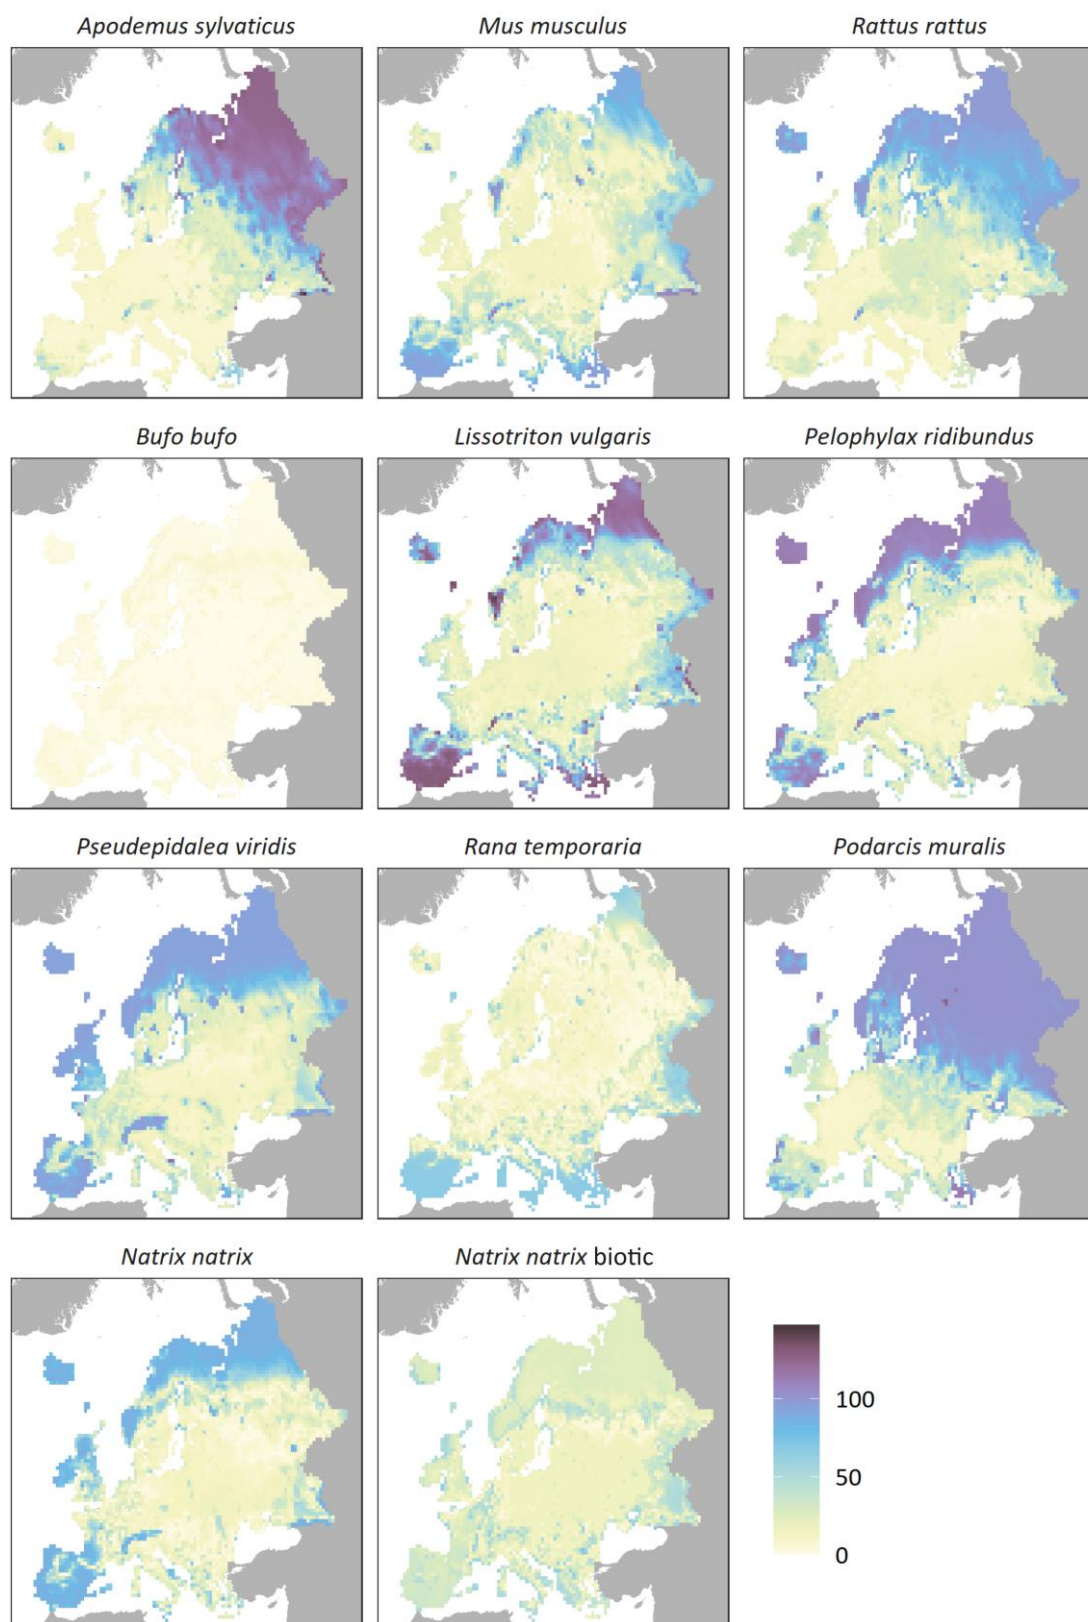

**Figure S3.** Coefficients of variation (standard deviation/mean) of the predictions for the ensemble species distribution model of each species and model type (abiotic and biotic) for *Natrix natrix*. Darker colors represent higher coefficient of variation and uncertainty of prediction. Scale: 1:110,000,000.



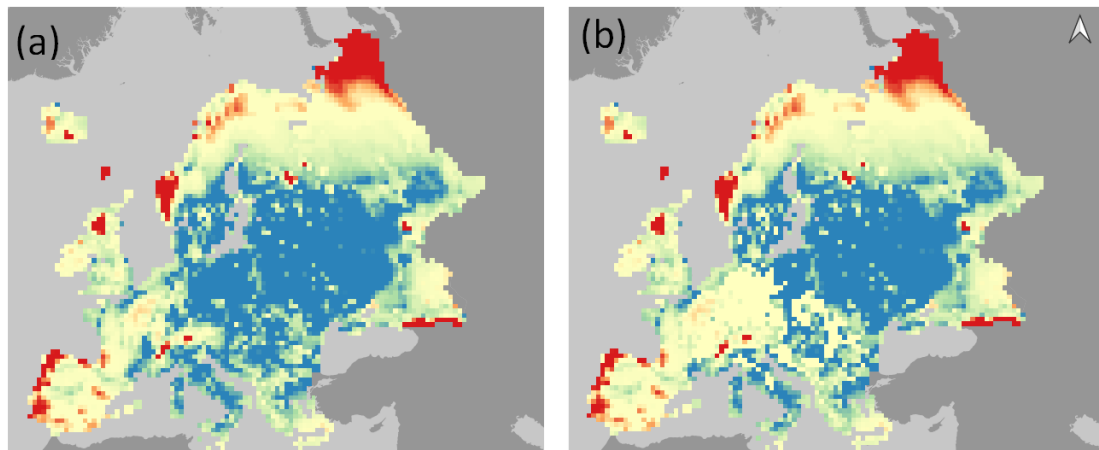

**Figure S4.** Multivariate environmental suitability surface maps (MESS) of the predictors included in: (a) the abiotic; and (b) the biotic model for current environmental conditions for *Natrix natrix*. Beige, red and blue colors represent marginal, common and uncommon conditions. Scale: 1:110,000,000.

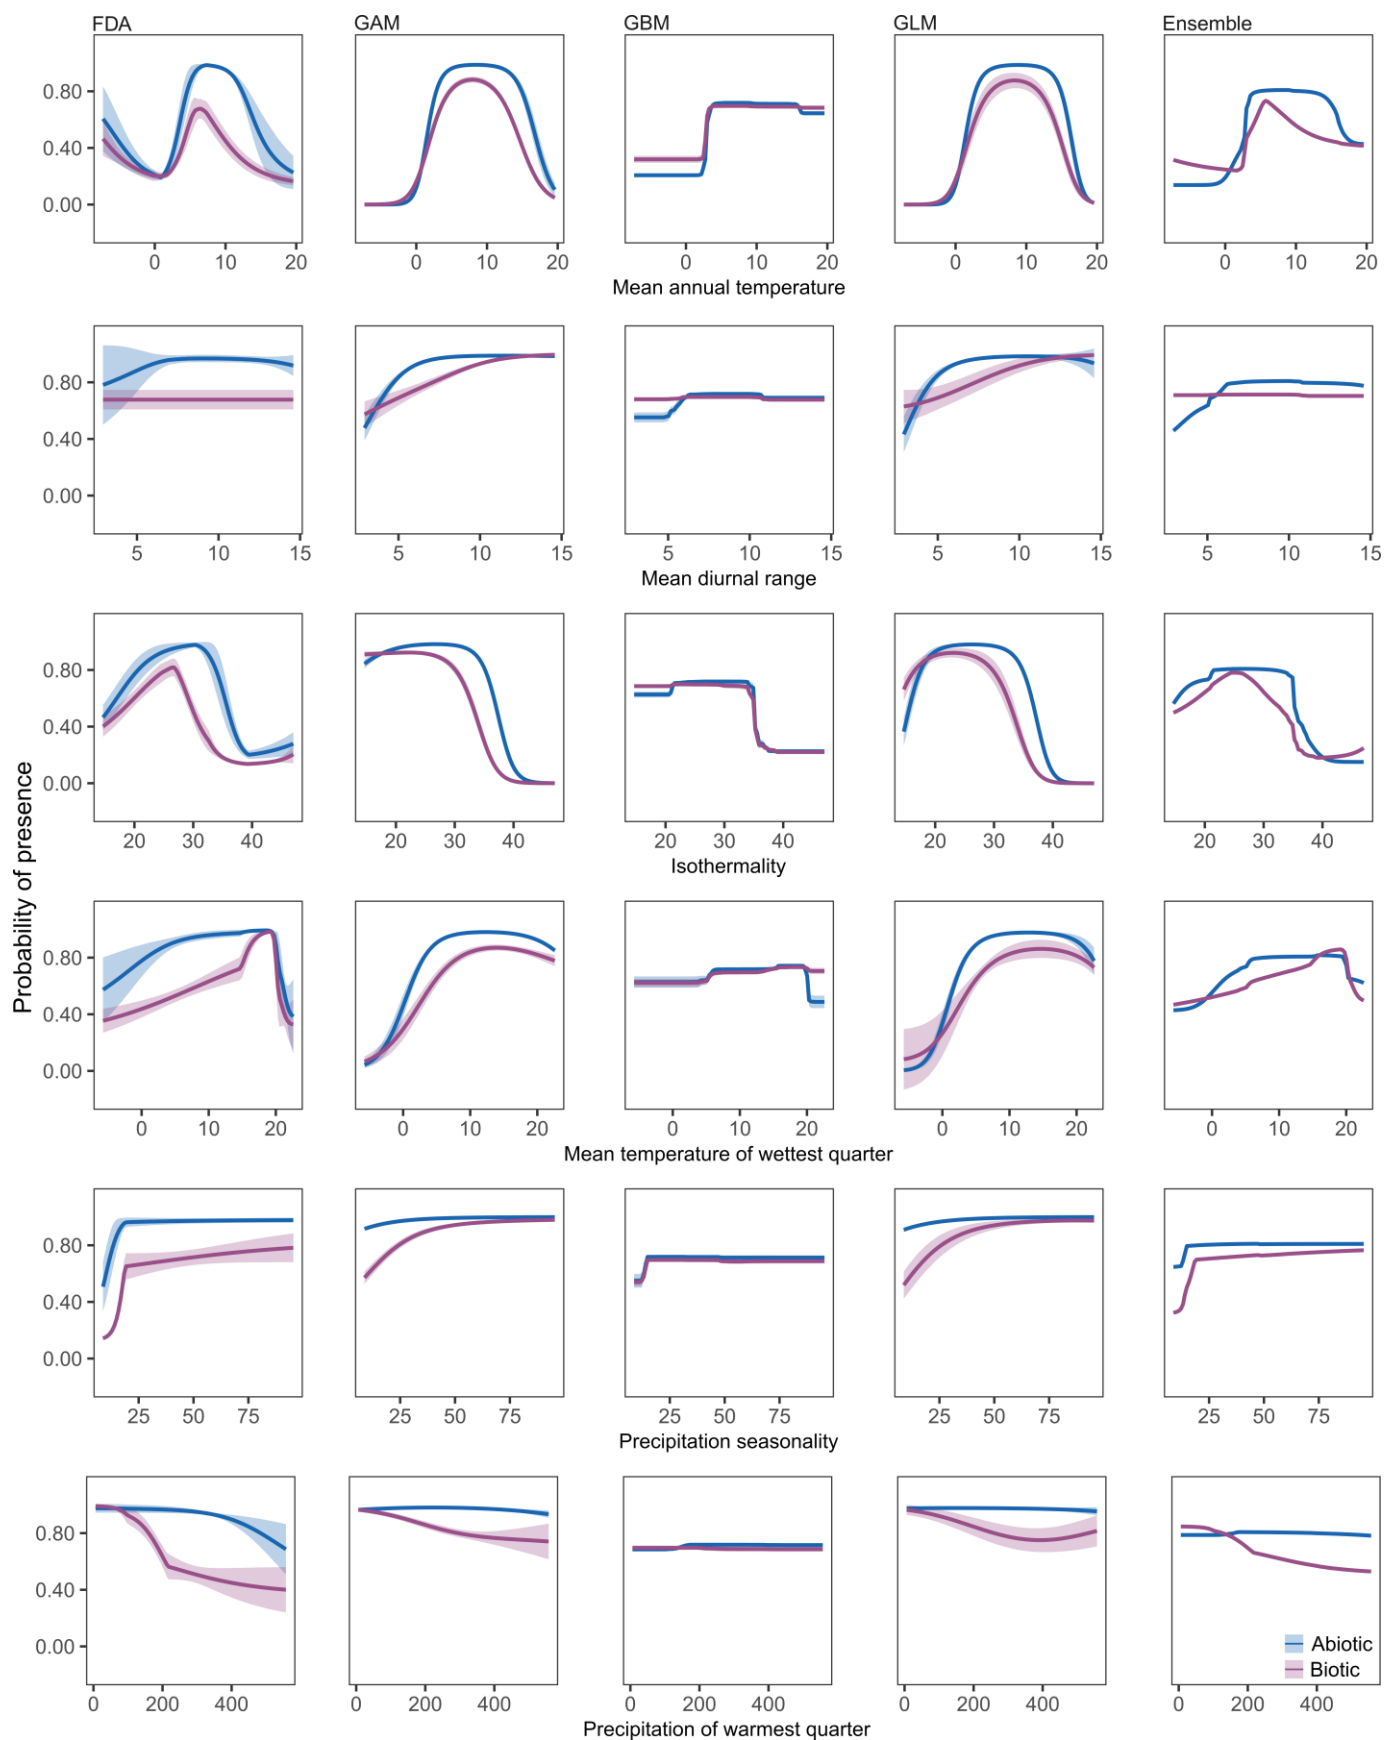

**Figure S5.** Predicted response curves from the different algorithms that were used in the individual and the ensemble models for *Natrix natrix* when all the other variables are set to their mean value. The lines are the average of the ten cross-validation runs for each algorithm. Colors blue and purple refer to the abiotic and biotic model respectively.

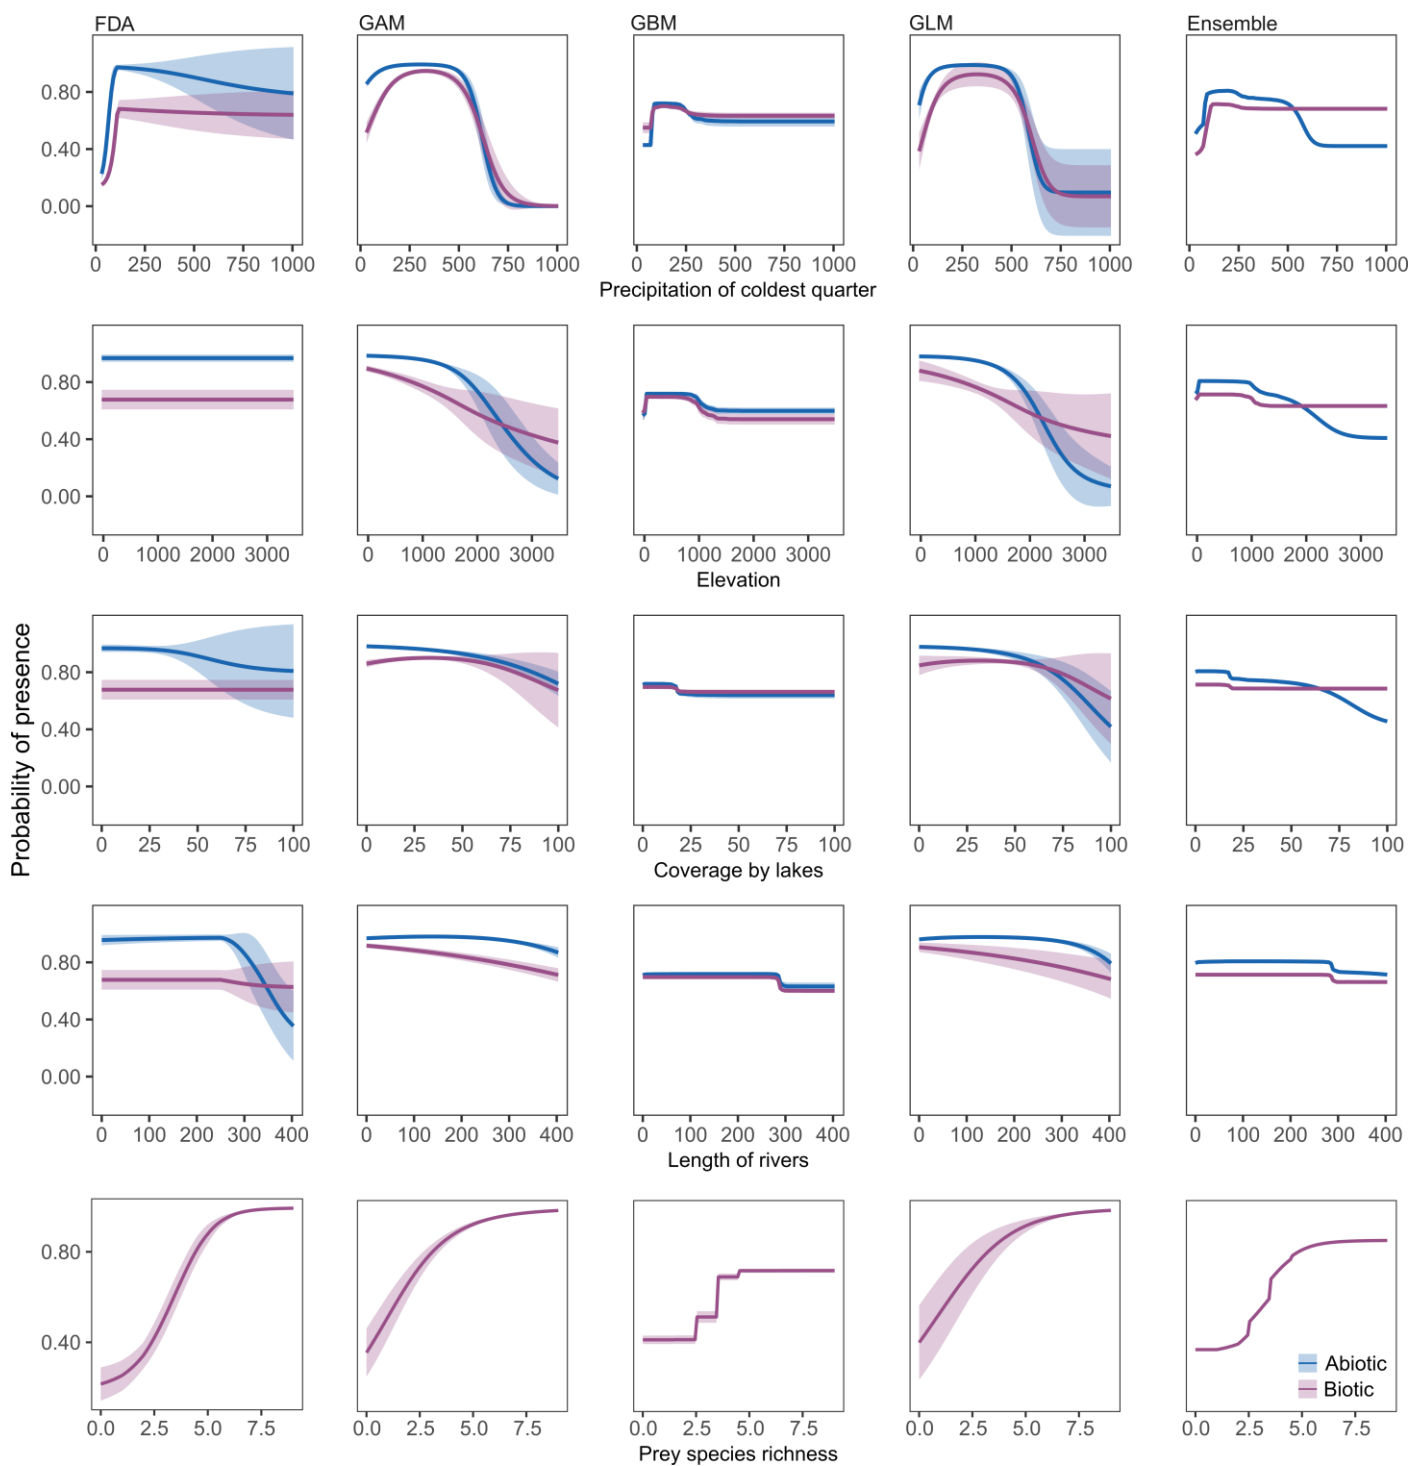

Figure S5. (Continued).

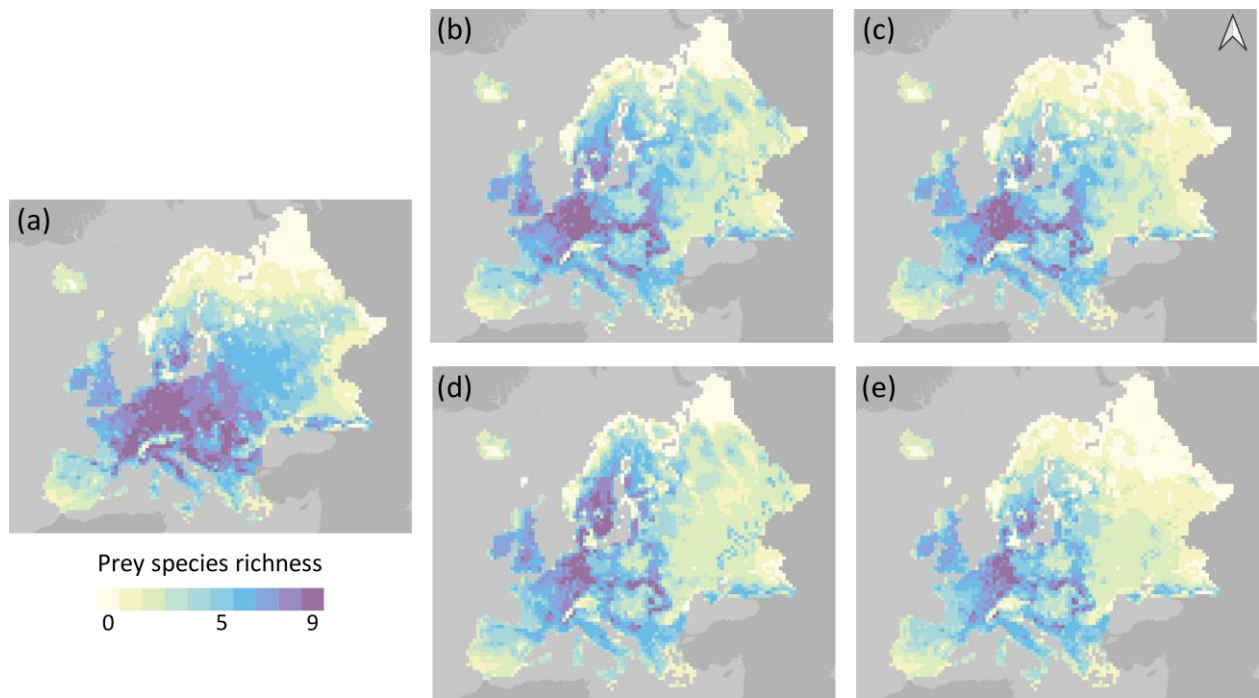

**Figure S6.** Predicted prey species richness: (a) under current environmental conditions; and by 2060 and 2080 respectively according to: (b,d) unhindered dispersal scenario; and (c,e) no dispersal scenario. The potential distribution of each prey species was estimated by an abiotic ensemble species distribution model. Scale: 1:110,000,000.

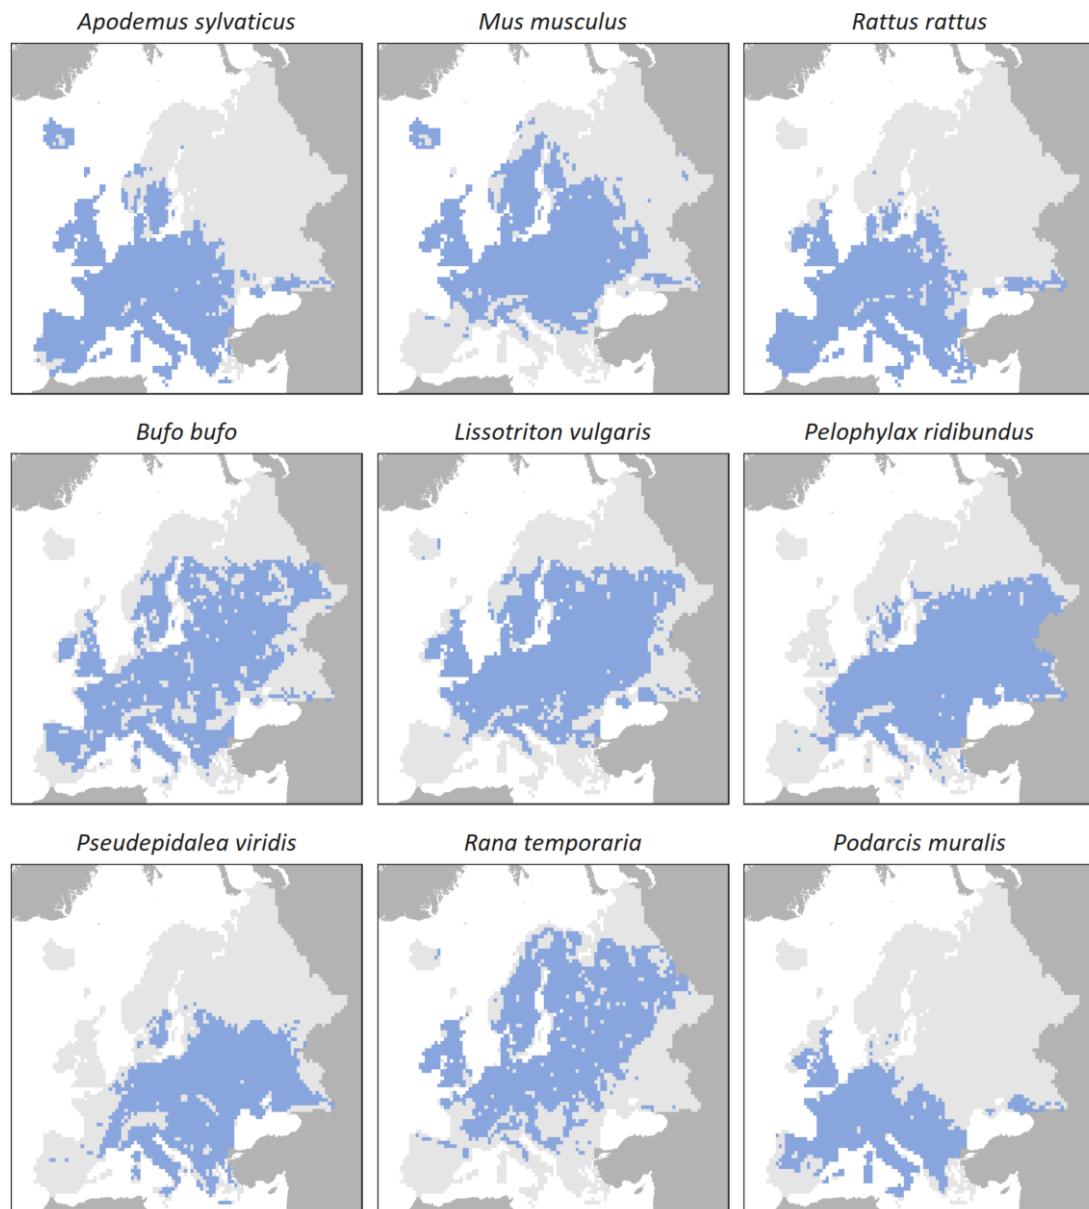

**Figure S7.** Predicted distribution of each prey species according to an abiotic ensemble species distribution model. Blue color represents presence and light gray absence. Scale: 1: 110,000,000.

## References

1. Fick, S.E.; Hijmans, R.J. WorldClim 2: new 1-km spatial resolution climate surfaces for global land areas. *International Journal of Climatology* **2017**, *37*, 4302–4315, doi:10.1002/joc.5086.
2. European Digital Elevation Model (EU-DEM), version 1.1. Copernicus Land Monitoring Services: 2019.
3. Kobayashi, T.; Tateishi, R.; Alsaadeh, B.; Sharma, R.; Wakaizumi, T.; Miyamoto, D.; Xiulian, B.; Bui, L.; Gegentana, G.; Maitiniyazi, A., et al. Production of Global Land Cover Data–GLCNMO 2013. *Journal of Geography and Geology* **2017**, *9*, doi:10.5539/jgg.v9n3p1.
4. CCM River and Catchment Database. European Commission - JRC: 2007.
5. Sillero, N.; Campos, J.; Bonardi, A.; Corti, C.; Creemers, R.; Crochet, P.-A.; Crnobrnja Isailović, J.; Denoël, M.; Ficetola, G.F.; Gonçalves, J., et al. Updated distribution and biogeography of amphibians and reptiles of Europe. *Amphibia-Reptilia* **2014**, *35*, 1–31, doi:10.1163/15685381-00002935.
6. Mitchell-Jones, A.J.; Amori, G.; Bogdanowicz, W.; Krystufek, B.; Reijnders, P.; Spitzenberger, F.; Stubbe, M.; Thissen, J.; Vohralik, V.; Zima, J. *The atlas of European mammals*; Academic Press London: 1999; Vol. 3.
7. IUCN. The IUCN Red List of Threatened Species. Available online: <https://www.iucnredlist.org> (accessed on 24 October).
